# Supplementary material
Source: Springer Nature journal article supplement (https://www.springermedizin.de/resource/supplementary/13041_2013_215_MOESM4_ESM.pdf/25657760)

# A AAC

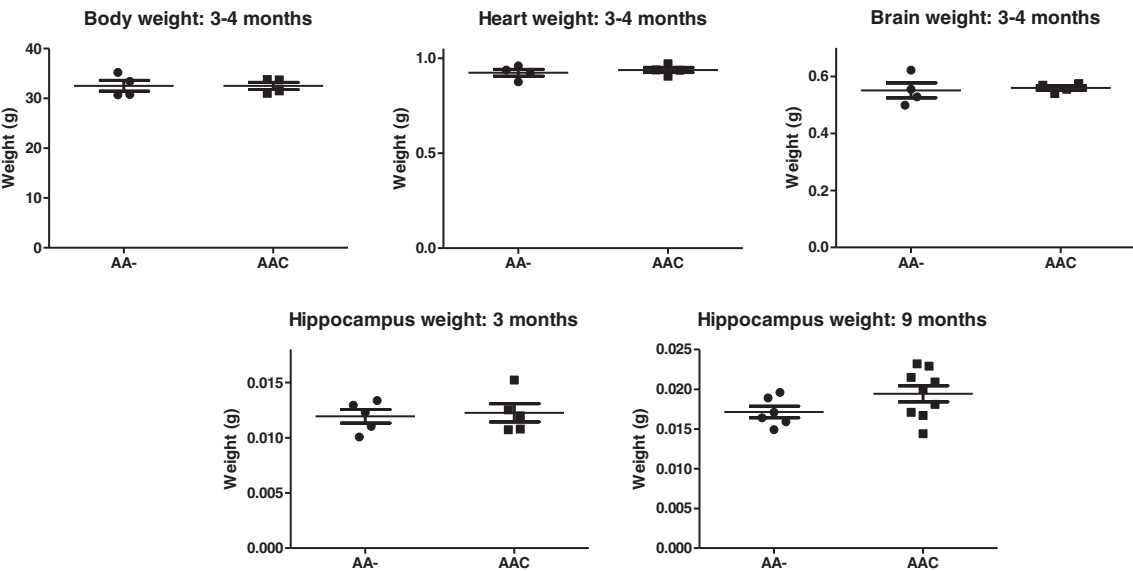

# B GSK3 $\alpha$ .KO

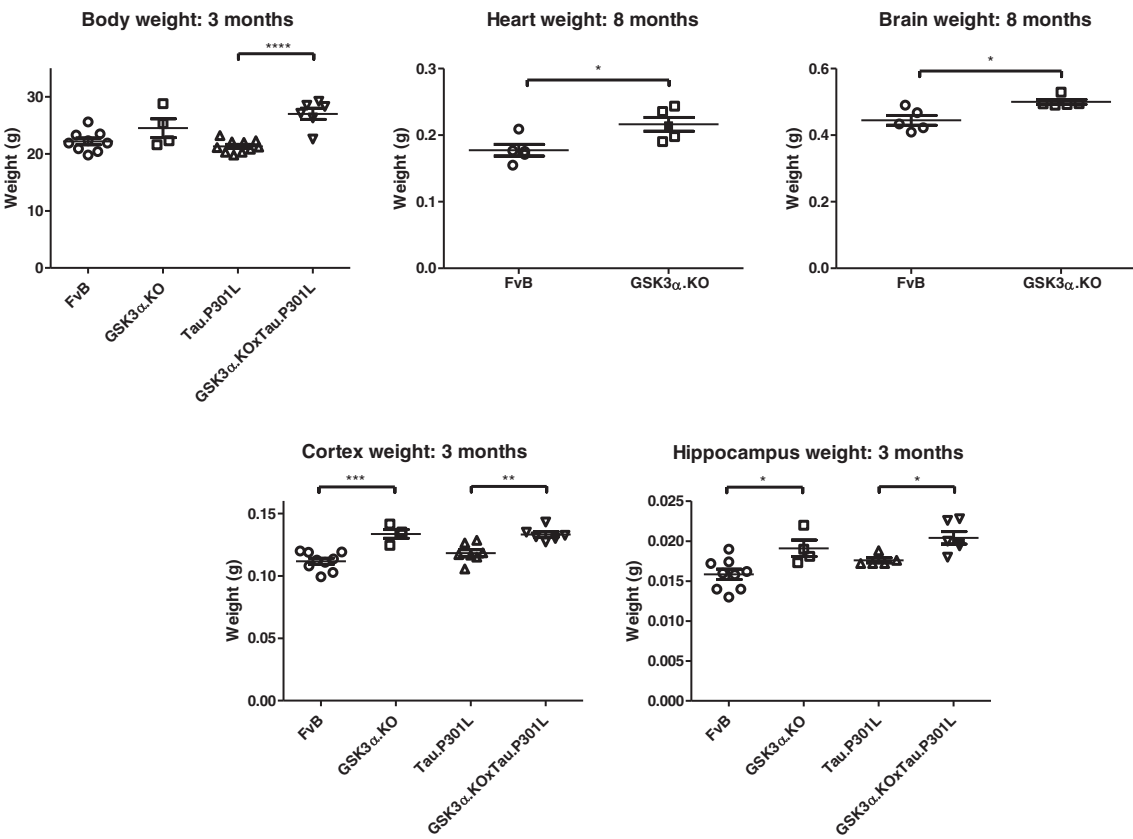

Supplement: MOESM4 [file 25657760]
